# Supplementary material for: Dynamics of Dissolution, Killing, and Inhibition of Dental Plaque Biofilm
Source: Front Microbiol. 2020 May 20;11:964. doi: 10.3389/fmicb.2020.00964 (PMC7251032; doi:10.3389/fmicb.2020.00964)
Supplement: Supplementary file 2 [file Data_Sheet_2.xlsx]

## Sheet: Sheet1
Supplementary data: Dataset for Figures 1,2,3 and 4
Fig 1 data set
Fig 1M													Fig 1N
	Mean of biovolume						SD of biovolume							Mean of dead percentage						SD of dead percentage
Time (min)	Sterile water	2% NaOCl	6% NaOCl	2% CHX		Time (min)	Sterile water	2% NaOCl	6% NaOCl	2% CHX			Time (min)	Sterile water	2% NaOCl	6% NaOCl	2% CHX		Time (min)	Sterile water	2% NaOCl	6% NaOCl	2% CHX
2	470639	355605	142678	435609		2	26805	34173	18538	28911			2	0.05	0.41	0.8	0.33		2	0.01	0.02	0.05	0.02
4	502286	364789	136122	429875		4	79500	42418	26952	28294			4	0.05	0.42	0.94	0.36		4	0.02	0.03	0.03	0.02
6	496773	304141	119591	441349		6	72557	36419	13615	35724			6	0.05	0.46	0.95	0.49		6	0.01	0.04	0.02	0.02
8	491336	306866	102182	460661		8	39536	28657	12729	43159			8	0.06	0.47	0.91	0.43		8	0.02	0.04	0.02	0.03
10	461157	241518	94587	378587		10	46353	43317	14323	26110			10	0.06	0.54	0.87	0.48		10	0.02	0.04	0.03	0.04
12	472717	210035	82731	431704		12	49258	45868	13737	34445			12	0.05	0.58	0.83	0.57		12	0.01	0.05	0.04	0.02
14	474708	211660	69354	443941		14	42876	43638	13304	47805			14	0.05	0.56	0.78	0.57		14	0.01	0.04	0.07	0.04
16	455442	207365	62754	467120		16	27671	31647	11157	44329			16	0.05	0.58	0.78	0.58		16	0.02	0.03	0.1	0.03
18	432843	209020	52542	478761		18	27651	33281	9256	36619			18	0.05	0.59	0.82	0.61		18	0.01	0.03	0.03	0.02
20	420415	190000	38164	425735		20	33894	35006	8074	27207			20	0.05	0.61	0.8	0.69		20	0.01	0.03	0.05	0.02
22	422039	190449	41641	392776		22	29820	31094	9334	35316			22	0.05	0.61	0.79	0.69		22	0.01	0.04	0.04	0.02
24	416614	192516	38802	386730		24	30145	31919	9546	32312			24	0.05	0.61	0.79	0.75		24	0.02	0.03	0.07	0.03
26	426927	166042	35071	395495		26	50771	33667	8277	53795			26	0.05	0.7	0.75	0.75		26	0.02	0.04	0.04	0.03
28	428021	159351	31921	463373		28	30604	35013	8790	37161			28	0.05	0.72	0.78	0.79		28	0.02	0.04	0.07	0.02
30	409982	154645	29947	445287		30	23202	32496	10516	35664			30	0.05	0.69	0.76	0.8		30	0.01	0.03	0.08	0.02
32	414637	151770	26148	456581		32	21957	32716	11071	20637			32	0.05	0.71	0.82	0.86		32	0.01	0.04	0.05	0.01
Fig 2 data set
Fig 2M													Fig 2N
	Mean of biovolume						SD of biovolume							Mean of dead percentage						SD of dead percentage
Time (min)	Sterile water	2% NaOCl	6% NaOCl	2% CHX		Time (min)	Sterile water	2% NaOCl	6% NaOCl	2% CHX			Time (min)	Sterile water	2% NaOCl	6% NaOCl	2% CHX		Time (min)	Sterile water	2% NaOCl	6% NaOCl	2% CHX
2	686619	521538	312952	636251		2	22334	39676	40437	24816			2	0.05	0.28	0.85	0.2		2	0.01	0.04	0.02	0.01
4	691617	528317	289264	660055		4	32514	44431	44839	19517			4	0.04	0.29	0.95	0.27		4	0.01	0.04	0.01	0.02
6	685101	432609	240830	622101		6	35952	38423	39858	13132			6	0.04	0.33	0.97	0.45		6	0.01	0.05	0.01	0.02
8	670448	365921	217566	636088		8	29885	43057	34897	13125			8	0.04	0.38	0.94	0.4		8	0.01	0.04	0.01	0.02
10	670377	313330	195616	571135		10	38439	32864	30836	55096			10	0.04	0.48	0.93	0.4		10	0.01	0.07	0.01	0.04
12	645612	269211	151336	615188		12	43292	42877	25480	16691			12	0.04	0.51	0.96	0.54		12	0.02	0.11	0.01	0.02
14	646326	269581	116711	604403		14	52766	44996	20101	67764			14	0.05	0.48	0.89	0.52		14	0.01	0.11	0.02	0.06
16	646456	275744	108235	661850		16	55692	46889	16182	19043			16	0.04	0.52	0.84	0.56		16	0.02	0.12	0.03	0.02
18	639212	279519	96783	685923		18	44753	46755	13655	53896			18	0.04	0.53	0.79	0.57		18	0.02	0.12	0.03	0.02
20	652187	238723	92716	635214		20	50297	40082	8817	25358			20	0.04	0.55	0.78	0.66		20	0.01	0.12	0.06	0.02
22	649747	252368	106854	584202		22	67623	41291	13545	23915			22	0.04	0.56	0.74	0.66		22	0.02	0.12	0.1	0.02
24	651544	249629	114051	674172		24	69785	41250	10245	101512			24	0.04	0.56	0.72	0.58		24	0.02	0.12	0.07	0.07
26	635950	186361	102293	523900		26	54417	29668	11331	69784			26	0.04	0.71	0.69	0.69		26	0.02	0.04	0.09	0.06
28	643945	180600	89750	556424		28	60734	30923	12128	26627			28	0.04	0.73	0.76	0.71		28	0.02	0.08	0.06	0.02
30	651321	155572	94212	546317		30	64727	28295	11906	73440			30	0.04	0.65	0.65	0.65		30	0.02	0.07	0.08	0.07
32	642990	160546	89392	595160		32	58368	31511	14962	29490			32	0.04	0.75	0.64	0.73		32	0.02	0.04	0.1	0.12
Fig 3 data set
Fig 3E													Fig 3J
	Mean of EPS biovolume						SD of EPS biovolume							Mean of EPS biovolume						SD of EPS biovolume
Time (min)	Sterile water	2% NaOCl	6% NaOCl	2% CHX		Time (min)	Sterile water	2% NaOCl	6% NaOCl	2% CHX			Time (min)	Sterile water	2% NaOCl	6% NaOCl	2% CHX		Time (min)	Sterile water	2% NaOCl	6% NaOCl	2% CHX
2	262036	197379	101009	254753		2	5579	5129	28018	10331			2	422903	344797	216013	384255		2	9151	59074	83424	24471
4	250725	136388	55227	250515		4	11680	27517	24731	11640			4	422325	201356	177023	369336		4	10486	40855	91701	22622
6	248058	111462	25857	248352		6	9698	16672	5373	10131			6	410691	162519	121364	355117		6	10403	30053	60297	25545
8	247495	92669	14790	240257		8	11444	9462	5675	11748			8	401011	127445	68236	362336		8	15170	21376	6005	10643
10	249155	69321	7329	240102		10	10426	20910	3547	11059			10	407447	96722	34483	356944		10	17965	18370	10078	13527
12	247468	27847	3669	234884		12	9520	14442	2458	16170			12	398049	66117	21850	342553		12	12442	28069	10651	12723
14	245646	22510	2154	228715		14	14237	11008	1261	10341			14	404439	55609	14192	333023		14	22341	29353	9548	23448
16	240858	11679	1206	228953		16	4823	5574	896	13160			16	403372	47598	11336	344495		16	11464	32747	11161	7088
18	239172	7375	712	224528		18	6149	2970	383	13322			18	404609	30801	8126	345733		18	15634	14498	8113	25081
20	237399	5348	299	223310		20	2042	2452	120	14467			20	396641	21563	10720	330016		20	27811	7307	10092	21372
22	240464	3186	219	221251		22	3541	1496	173	15931			22	407699	15372	4844	332815		22	36535	10540	4806	10889
24	234986	2007	71	221316		24	3345	1088	68	2798			24	391857	10835	738	331408		24	23803	7271	931	7132
26	235206	853	56	218290		26	6815	546	55	5973			26	389717	7951	572	325380		26	12292	6739	657	6950
28	234252	380	68	216928		28	4493	288	46	6012			28	382937	6103	254	333754		28	20008	5668	240	25273
30	235908	158	53	219566		30	4075	108	48	2347			30	393812	4065	201	325527		30	6801	3133	261	9117
32	231982	114	32	215303		32	3505	96	26	4660			32	392177	3282	171	324530		32	13884	2375	222	3874
Fig 4 data set
Fig 4E
	Mean of biovolume						SD of biovolume
Time (min)	Sterile water	0.02% CHX	0.2% CHX	2% CHX		Time (min)	Sterile water	0.02% CHX	0.2% CHX	2% CHX
0	3250	3441	8089	5413		0	2131	2013	2528	2873
20	3328	3413	11448	6760		20	2161	2121	6229	2820
40	3103	3481	11983	7252		40	2273	1973	5565	2061
60	3012	4708	11201	7096		60	2300	3471	5008	2311
80	3100	2662	10233	5948		80	2566	768	2612	2277
100	2840	2585	10467	6714		100	2426	684	3407	2165
120	2852	5128	10917	6619		120	2468	3019	1736	2251
140	3047	4968	10113	5980		140	2669	3529	463	2863
160	3202	5038	9788	6208		160	2739	3550	1366	2718
180	10498	2508	7504	4802		180	4669	876	3913	3818
200	10591	2790	8309	5224		200	4782	584	3919	3630
220	19150	2590	8486	4768		220	14305	826	4208	3196
240	20378	2850	8906	5007		240	5554	1119	4388	3435
260	22479	4201	9186	4796		260	12876	1966	4512	2873
280	20018	6288	9096	4738		280	7732	1674	4281	2781
300	18678	7402	9448	4756		300	7820	2340	4534	2830
320	23926	7089	9561	4570		320	14400	2709	4509	3177
340	18329	7339	9702	4835		340	5899	2623	4500	2666
360	17770	7479	9268	4438		360	4825	2628	4196	2294
380	25687	7466	8906	4645		380	3386	2493	3875	2667
400	27797	5098	8059	4353		400	11493	2346	3690	2131
420	18259	5038	7611	4266		420	9063	2356	4311	1893
440	30480	5205	7426	4414		440	18833	2471	4184	1762
460	51226	4944	7180	4145		460	23326	2357	3845	1740
480	52429	14400	6909	3961		480	9081	10380	3645	1985
500	30712	26627	6783	3835		500	14111	27251	3462	1727
520	26800	36021	6343	3902		520	15789	40009	3480	1859
540	31703	39137	6500	3914		540	14122	40472	3540	1798
560	56058	50008	6680	3823		560	19277	35622	3895	1625
580	65655	49078	6837	3871		580	21042	37771	4003	1444
600	66975	71473	6405	3819		600	18443	37913	3558	1678
620	114496	87209	6324	3737		620	57429	30690	3526	1574
640	127959	97631	6009	3746		640	50133	17174	3146	1724
660	121062	105942	6000	3517		660	68176	16939	3104	1477
680	125010	103217	6151	3687		680	65744	20260	3321	747
700	135218	105817	6104	3710		700	59091	17070	3285	1469
720	170996	103232	5935	3423		720	35478	18420	3062	493
